# Supplementary material for: The synthesis and aqueous solution properties of sulfobutylbetaine (co)polymers: comparison of synthetic routes and tuneable upper critical solution temperatures
Source: Royal Society of Chemistry journal article supplement (doi:10.1039/c5py00160a), 2015-01-01
Supplement: c5py00160a1.pdf [file c5py00160a1.pdf]

—Supporting Information—

The synthesis and aqueous solution properties of sulfobutylbetaine  
(co)polymers: Comparison of synthetic routes and tuneable upper critical  
solution temperatures

Yicheng Zhu,<sup>†</sup> Janina-Miriam Noy,<sup>†</sup> Andrew B. Lowe,<sup>†,‡</sup> Peter J. Roth<sup>†,‡,\*</sup>

<sup>†</sup> Centre for Advanced Macromolecular Design (CAMD), School of Chemical Engineering, University of New South Wales, Kensington, Sydney NSW 2052, Australia

<sup>‡</sup> *present address*: Nanochemistry Research Institute (NRI), Department of Chemistry, Curtin University, Bentley, Perth WA 6102, Australia

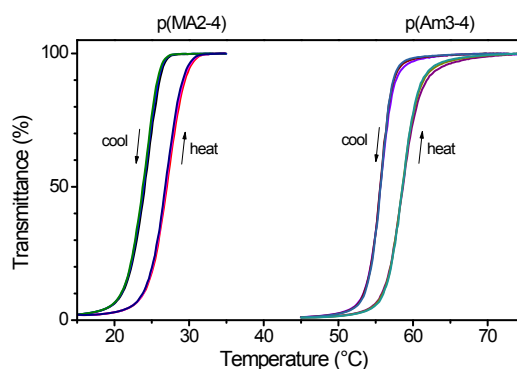

**Figure S1.** Representative cycling turbidity measurement showing good reproducibility and a hysteresis of  $\sim 3$  °C during three consecutive heating and cooling cycles for RAFT-made **p(MA2-4)** (left) and pPFPA-derived **p(Am3-4)** (right).

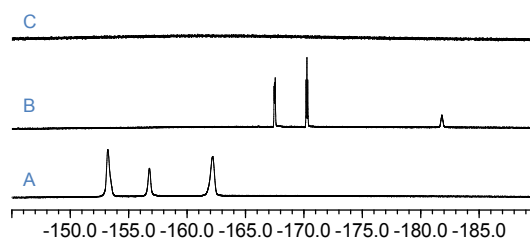

**Figure S2.**  $^{19}\text{F}$  NMR spectra of (A) precursor pPFPA; (B) after reaction with **amine3-4** before purification showing the signals of free pentafluorophenol, and (C) of the resulting **p(Am3-4)** polymer after purification indicating complete removal of pentafluorophenol by dialysis.
